# Supplementary material for: Lifestyle Habits Predict Academic Performance in High School Students: The Adolescent Student Academic Performance Longitudinal Study (ASAP)
Source: PubMed Central journal article supplement (PMC6982263; doi:10.3390/ijerph17010243), 2019-12-29
Supplement: ijerph-17-00243-s001.pdf [file ijerph-17-00243-s001.pdf]

## Supplementary 1

Hierarchical regression analyses with theoretically-driven covariates included in the analyses, which represent all the variables measured in this study (physical activity, sleep habits, screen time and eating habits). Because of the limited sample size, we had to test separately each variable and, thereafter, we were able to test a combination of factors based on significant variables for each dependant variable.

**Table S1.** Hierarchical regression analysis regarding independent predictors of cognitive control in high school female students

| Dependent variables              | Independent variables       | $\beta$ | Total $r^2$ | $P$ value |
|----------------------------------|-----------------------------|---------|-------------|-----------|
| $\Delta$ Flanker congruent MRT   | Social media on WD at Y1    | 0.28    | 0.147       | 0.001     |
|                                  | Daily meals at Y1           | -0.29   |             |           |
| $\Delta$ Flanker incongruent MRT | Daily meals at Y1           | -0.24   | 0.099       | 0.012     |
|                                  | Social media on WD at Y1    | 0.22    |             |           |
| $\Delta$ 1-back accuracy         | Daily meals at Y1           | 0.39    | 0.210       | 0.000     |
|                                  | $\Delta$ Total screen on WD | -0.24   |             |           |
| $\Delta$ 2-back accuracy         | $\Delta$ Video games on WE  | -0.32   | 0.100       | 0.007     |
| $\Delta$ 2-back MRT              | Social media on WD at Y1    | 0.41    | 0.206       | 0.000     |
|                                  | Daily meals at Y1           | -0.25   |             |           |

MRT: mean reaction time, WD: weekdays, WE: weekend, Y1: Year 1. None of the demographics variables (age, pubertal status and socioeconomic status) included in step 1 analysis remained in the final model. None of the lifestyle variables remained as a significant predictor for  $\Delta$  in Flanker congruent accuracy,  $\Delta$  in Flanker incongruent accuracy,  $\Delta$  in 1-back MRT and  $\Delta$  in  $d'$ .

**Table S2.** Hierarchical regression analysis regarding independent predictors of cognitive control in high school male students

| <b>Dependent variables</b> | <b>Independent variables</b> | <b><i>b</i></b> | <b>Total <i>r</i><sup>2</sup></b> | <b><i>P</i> value</b> |
|----------------------------|------------------------------|-----------------|-----------------------------------|-----------------------|
| Δ2-back accuracy           | ΔSocial media on WE          | -0.28           | 0.081                             | 0.024                 |

MRT: mean reaction time, WD: weekdays, WE: weekend, Y1: Year 1. None of the demographics variables (age, pubertal status and socioeconomic status) included in step 1 analysis remained in the final model. None of the lifestyle variables remained as a significant predictor for Δ in Flanker congruent accuracy, Δ in Flanker incongruent accuracy, Δ in Flanker congruent MRT, Δ in Flanker incongruent MRT, Δ in 1-back accuracy, Δ in 1-back MRT, Δ in 2-back MRT and Δ in *d'*.

**Table S3.** Hierarchical regression analysis regarding independent predictors of academic performance in high school female students

| <b>Dependent variables</b> | <b>Independent variables</b> | <b><math>\beta</math></b> | <b>Total <math>r^2</math></b> | <b><math>P</math> value</b> |
|----------------------------|------------------------------|---------------------------|-------------------------------|-----------------------------|
| $\Delta$ Language          | $\Delta$ Wake-up time on WE  | 0.25                      | 0.062                         | 0.03                        |

WE: weekend. None of the demographics variables (age, pubertal status and socioeconomic status) included in step 1 analysis remained in the final model. None of the lifestyle variables remained as a significant predictor for  $\Delta$  in overall average,  $\Delta$  in science,  $\Delta$  in mathematics.

**Table S4.** Hierarchical regression analysis regarding independent predictors of academic performance in high school male students

| <b>Dependent variables</b> | <b>Independent variables</b>   | <b><math>\beta</math></b> | <b>Total <math>r^2</math></b> | <b><i>P</i> value</b> |
|----------------------------|--------------------------------|---------------------------|-------------------------------|-----------------------|
| $\Delta$ Overall average   | $\Delta$ Daily servings of F/V | 0.44                      | 0.334                         | 0.000                 |
|                            | $\Delta$ Bedtime on WD         | -0.35                     |                               |                       |
| $\Delta$ Science           | Age                            | 0.60                      | 0.392                         | 0.000                 |
|                            | $\Delta$ Studying time         | 0.24                      | 0.059                         | 0.009                 |
| $\Delta$ Mathematics       | Age                            | -0.26                     | 0.069                         | 0.027                 |
|                            | $\Delta$ Bedtime on WD         | -0.45                     | 0.202                         | 0.000                 |
| $\Delta$ Language          | $\Delta$ Computer on WE        | -0.39                     | 0.179                         | 0.001                 |
|                            | Video games on WE at Y1        | -0.25                     |                               |                       |

F/V: fruits and vegetables, WD: weekdays, WE: Wweekend. None of the demographics variables (age, pubertal status and socioeconomic status) included in step 1 analysis remained in the final model for  $\Delta$  in overall average and  $\Delta$  in in language.
